# Supplementary material
Source: MDPI journal article supplement (https://www.mdpi.com/2311-5637/7/4/254)
Supplement: s1 [file s1]

**Table S1 Chemical sensors used in electronic nose corresponding to different types of volatile substances**

| Sensor array | Sensor name | Sensor sensitives                                                                                                |
|--------------|-------------|------------------------------------------------------------------------------------------------------------------|
| S1           | W1C         | Aromatic organic compounds                                                                                       |
| S2           | W5S         | High sensitivity and sensitive with nitrogen oxides                                                              |
| S3           | W3C         | Ammonia, a sensor for aromatic compounds                                                                         |
| S4           | W6S         | Mainly selective for hydrogen                                                                                    |
| S5           | W5C         | Alkanes, aromatic compounds, and nonpolar organic compounds                                                      |
| S6           | W1S         | Sensitive to methane. Broad range of organic compounds detected                                                  |
| S7           | W1W         | Sensitive to sulfides, for example, H <sub>2</sub> S, sensitive to organic components of hydrocarbon and sulphur |
| S8           | W2S         | Detection of alcohol, partially sensitive to aromatic compounds, wide range                                      |
| S9           | W2W         | Aromatic compounds, sensitive to organic sulfides                                                                |
| S10          | W3S         | Sensitive to alkanes, for example, high concentrations (>100 mg/kg) of methane and aliphatic organic compounds   |

**Table S2 Standard solution for electronic tongue analysis**

| Solution                       | Ingredient                                                         |
|--------------------------------|--------------------------------------------------------------------|
| Reference solution             | 2.2365g NaCl, 0.0450g tartaric acid                                |
| Anionic solution               | 300 mL ethyl alcohol, 8.3 mL HCl                                   |
| Cationic solution              | 7.46 g KCl, 0.56 g KOH, 300 mL ethyl alcohol                       |
| Saltiness standard solution    | 22.365 g KCl, 0.0450 g tartaric acid                               |
| Sourness standard solution     | 2.2365 g KCl, 0.0450 g tartaric acid                               |
| Umami                          | 2.2365 g KCl, 0.0450 g tartaric acid, 1.691 g sodium glutamate     |
| Bitterness standard solution 1 | 2.2365g KCl, 0.0450g tartaric acid, 0.0361 g quinine hydrochloride |
| Bitterness standard solution 2 | 2.2365g KCl, 0.0450g tartaric acid, 0.1 mL iso- $\alpha$ -acid     |
| Astringency standard solution  | 2.2365 g KCl, 0.0450 g tartaric acid, 0.5 g tannin                 |

**Table S3 Sensory scoring rules for the SCG fermented beverages**

| Items and weight             | Characteristics                                                                                                | Score |
|------------------------------|----------------------------------------------------------------------------------------------------------------|-------|
| Color and lustre (20 points) | Clear, transparent, glossy, pleasing, and harmonious                                                           | 20-19 |
|                              | Clear, transparent, and glossy                                                                                 | 17-18 |
|                              | Clear, no impurities, and no luster                                                                            | 14-16 |
|                              | Slight turbidity and light loss                                                                                | <13   |
| Aroma (30 points)            | A typical coffee aroma, wine is fragrant and harmonious                                                        | 27-30 |
|                              | Good and relative harmonious coffee and wine aromas                                                            | 23-26 |
|                              | A light coffee aroma and a weak wine aroma                                                                     | 19-22 |
|                              | Insufficient, unpleasant, or slight peculiar aromas                                                            | 15-18 |
|                              | Bad and disgusting aromas                                                                                      | <14   |
| Taste (40 points)            | Full-bodied, mellow, and refreshing wine with a harmonious sour, sweet, and bitter taste and a long aftertaste | 37-40 |
|                              | Soft and refreshing wine with an appropriate sour, sweet, and bitter taste                                     | 33-36 |
|                              | A harmonious and pure wine taste                                                                               | 26-32 |
|                              | Too sour/bitter/sweet, greasy, and less-rich wine tastes                                                       | 19-25 |
|                              | A bland sour, astringent, and bitter taste and a peculiar taste                                                | <18   |
| Style (10 points)            | Perfect typicality of coffee wine and unique and elegant characteristics                                       | 10    |
|                              | Obvious typicality of coffee wine and a good style                                                             | 8-9   |
|                              | A certain typicality of coffee wine but not elegant enough                                                     | 6-7   |
|                              | Without typicality of coffee wine                                                                              | <5    |

**Table S4 Performance of different yeast strains in SCG extract**

| Yeast strains             | CO <sub>2</sub> production <sup>a</sup> | Ethanol (% vol) <sup>b</sup> | Sensory score <sup>b</sup> | Aroma description <sup>b</sup>                        |
|---------------------------|-----------------------------------------|------------------------------|----------------------------|-------------------------------------------------------|
| <i>S. cerevisiae</i> D254 | +++                                     | 6.9 ± 0.2 <sup>B</sup>       | 75 ± 3.8 <sup>A</sup>      | A typical coffee aroma with plump and harmonious wine |
| <i>S. bayanus</i> BV818   | ++                                      | 6.6 ± 0.1 <sup>B</sup>       | 66 ± 4.2 <sup>BC</sup>     | A relative light coffee aroma with monotonous wine    |
| <i>S. bayanus</i> DV10    | ++                                      | 5.5 ± 0.1 <sup>C</sup>       | 72 ± 3.2 <sup>AB</sup>     | A typical coffee aroma with relative monotonous wine  |
| <i>S. bayanus</i> EC1118  | +++                                     | 7.5 ± 0.1 <sup>A</sup>       | 62 ± 1.8 <sup>C</sup>      | A light coffee aroma with monotonous wine             |

Values with different superscript capital letters in the same column are significantly different according to the one-way ANOVA and HSD tests.

<sup>a</sup> CO<sub>2</sub> production was assayed in the Durham tube fermentation. 0.4 mL activated commercial yeast strains were inoculated in 10 mL 13°Brix SCG extract at 28°C for 12 h. + means that the Durham tube was filled with 1/4 volume of gas, ++ means that the Durham tube was filled with 1/2 volume of gas, +++ means that the Durham tube was filled with 3/4 volume of gas, ++++ means that the Durham tube was almost full of gas.

<sup>b</sup>4% activated commercial yeast strains were added to SCG extract, which was mixed with 20% sucrose and pH was adjusted to 4.0 by citric acid. The main fermentation was conducted at 25 °C for 9 days. The fermentations were conducted three times.

**Table S5 Chemical parameters of unfermented SCG extract**

| Category                             |     | Compounds                |     |              |     |              |     |              |
|--------------------------------------|-----|--------------------------|-----|--------------|-----|--------------|-----|--------------|
| Sugars (g/L) <sup>a</sup>            |     | Fructose 3.59 ± 0.08     |     |              |     |              |     |              |
|                                      |     | Glucose 3.94 ± 0.25      |     |              |     |              |     |              |
|                                      |     | Sucrose 240.85 ± 12.6    |     |              |     |              |     |              |
|                                      |     | Arabinose 2.03 ± 0.11    |     |              |     |              |     |              |
| Organic acids (g/L) <sup>b</sup>     |     | Oxalic acid 2.62 ± 0.02  |     |              |     |              |     |              |
|                                      |     | L-Malic acid 1.05 ± 0.07 |     |              |     |              |     |              |
|                                      |     | Lactic acid 1.39 ± 0.01  |     |              |     |              |     |              |
|                                      |     | Acetic acid 0.08 ± 0.00  |     |              |     |              |     |              |
|                                      |     | Citric acid 2.51 ± 0.01  |     |              |     |              |     |              |
| Free amino acids (mg/L) <sup>c</sup> | Asp | 13.41 ± 0.07             | Gly | 5.06 ± 0.37  | Cys | 11.01 ± 0.07 | Ile | /            |
|                                      | Glu | /                        | Thr | /            | Val | 2.35 ± 0.07  | Leu | 2.82 ± 0.30  |
|                                      | Asn | 31.73 ± 1.03             | Cit | /            | Met | /            | Lys | /            |
|                                      | Ser | 0.94 ± 1.33              | Arg | /            | Nva | 3.24 ± 0.44  | Hyp | 78.12 ± 8.34 |
|                                      | Gln | /                        | Ala | 14.66 ± 3.62 | Trp | 12.47 ± 0.37 | Sar | 12.94 ± 0.15 |
|                                      | His | /                        | Tyr | /            | Phe | 6.89 ± 0.15  | Pro | 12.47 ± 1.25 |
|                                      |     |                          |     |              |     |              |     |              |
| Inorganic ions (mg/L) <sup>d</sup>   |     | K 10.36 ± 0.37           |     |              |     |              |     |              |
|                                      |     | Mg 1.92 ± 0.06           |     |              |     |              |     |              |
|                                      |     | P 2.36 ± 0.01            |     |              |     |              |     |              |
|                                      |     | S 1.63 ± 0.10            |     |              |     |              |     |              |

/ Not detected

<sup>a</sup> Samples were mixed with 219 g/L zinc acetate solution and 106 g/L potassium ferrocyanide solution at a ratio of 10:1:1. After centrifuging at 9000 r/min at 4 °C for 15 min, the supernatants

were filtered through a 0.22  $\mu\text{m}$  filter membrane (Millipore, Billerica, MA, USA). Sugars were analyzed using high-performance liquid chromatography (HPLC, Waters ACQUITY UPLC, Mass, USA) with a refractive index detector and a Luna  $\text{®}$  5 $\mu\text{m}$   $\text{NH}_2$  100 $\text{\AA}$  LC column (250\*4.6 mm, phenomenex, CA, USA) at 40  $^\circ\text{C}$ . Acetonitrile and deionized water (volume ratio 70:30) were used as the mobile phase at a flow rate of 1.0 mL/min. The detection wavelength was 210 nm. Sugars were quantified by external standards.

<sup>b</sup> Samples were mixed with 92 g/L zinc acetate solution and 183 g/L potassium ferrocyanide solution at a ratio of 1:1:1. After centrifuging at 9000 r/min at 4  $^\circ\text{C}$  for 15 min, the supernatants were filtered through a 0.22  $\mu\text{m}$  filter membrane. Organic acids were analyzed using HPLC (Agilent 1260, Agilent, CA, USA) with a DAD detector and a ZORBAX-SB-Aq column (250\*4.6 mm, Agilent, CA, USA) at 30  $^\circ\text{C}$ . Perchloric acid aqueous solution (perchloric acid aqueous: deionized water =4:10000, pH2.5) and methanol (volume ratio 98:2) were used as the mobile phase at a flow rate of 0.6 mL/min. The detection wavelength was 210 nm. Organic acids were quantified by external standards.

<sup>c</sup> 1.0 g samples were mixed with 5 mL 0.01M HCl in boiling water bath for 30 min. After centrifuging at 10000 r/min at 4  $^\circ\text{C}$  for 10 min, the supernatants were mixed with 2 mL 0.01M HCl with ultrasonic treatment for 5 min. The collected supernatants were filtered through a 0.22  $\mu\text{m}$  filter membrane. The amino acids were derivatized using an automatic on-line derivatization method of Agilent. The primary and secondary amino acids were reacted with phthalaldehyde (OPA) and fluorene methoxycarbonyl chloride (FMOC), respectively. HPLC was used to determine the amino acids with an Agilent 1100 apparatus and a ZORBAX Eclipse AAA column (4.6 x 150 mm, 3.5  $\mu\text{m}$ , Agilent, CA, USA). Sodium dihydrogen phosphate (40 mM, pH7.8) was used as the mobile phase A. The mobile phase B contained acetonitrile, methanol, and water (volume ratio 45:45:10). The gradient was 0% B (0 min), 0% B (1 min), 57% B (23 min), 100% B (27 min), 100% B (34 min), 0% B (40 min), and 0% B (41 min). The amino acids were quantified by external standards.

<sup>d</sup> Appropriate samples were mixed with 4 mL  $\text{HNO}_3$ , 1 mL HCl, and 0.5 mL  $\text{H}_2\text{O}_2$  at a room temperature for 15 min. Then, the temperature raised to 220  $^\circ\text{C}$  in 30 min and held for 20 min. The mixtures were filtered through a 0.22  $\mu\text{m}$  filter membrane and adjusted to 10 mL using deionized water. Four kinds of inorganic ions were analyzed by ICP-OES (Agilent 720, Agilent, CA, USA).

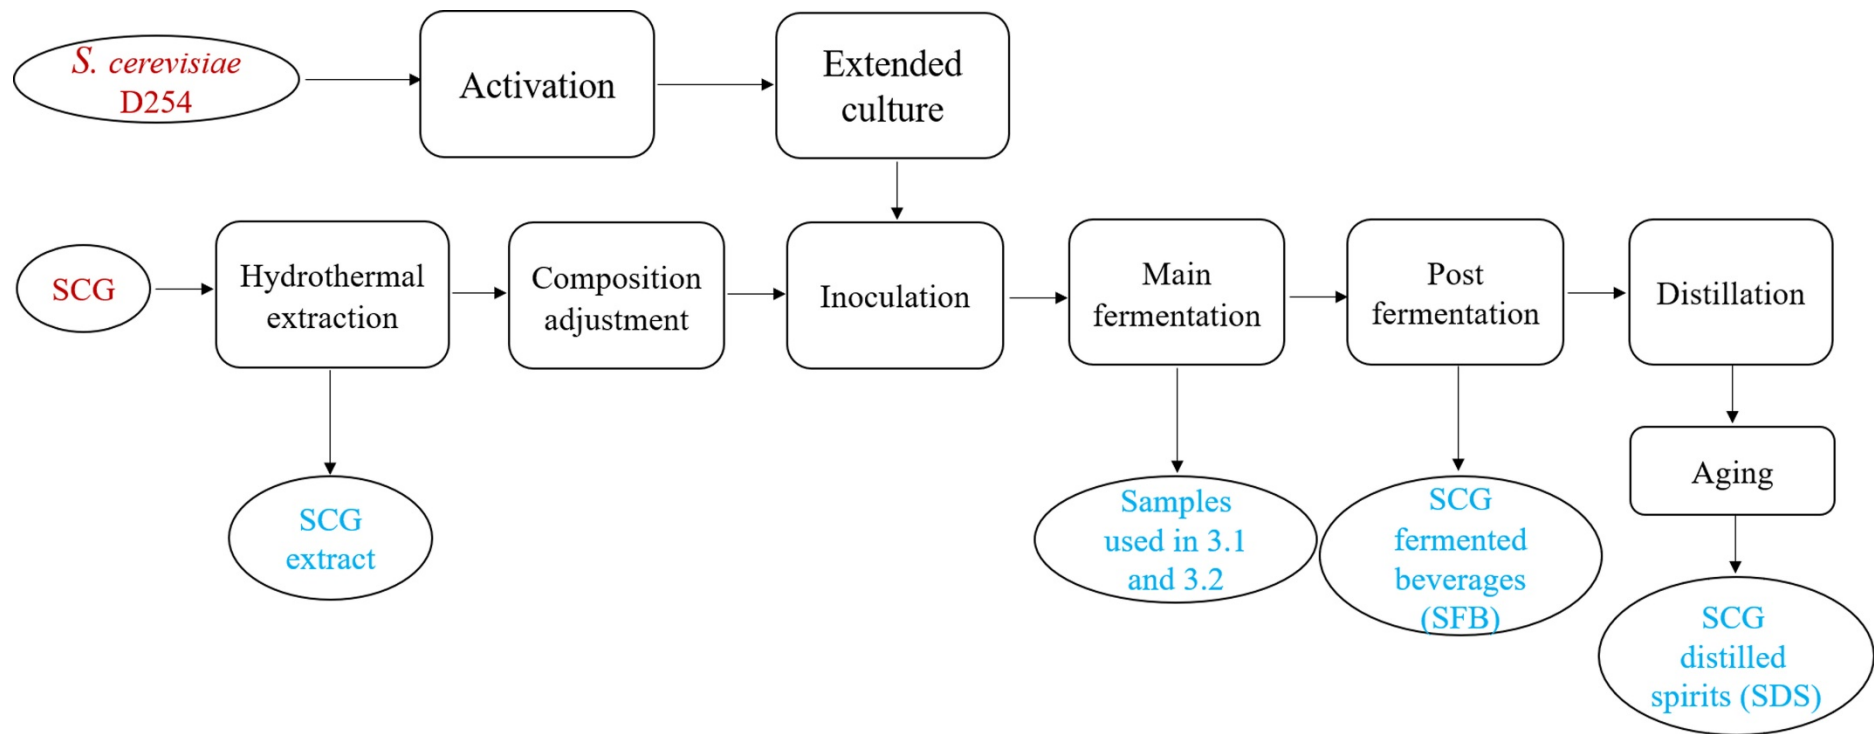

**Figure S1.** The brewing process of SCG beverages.



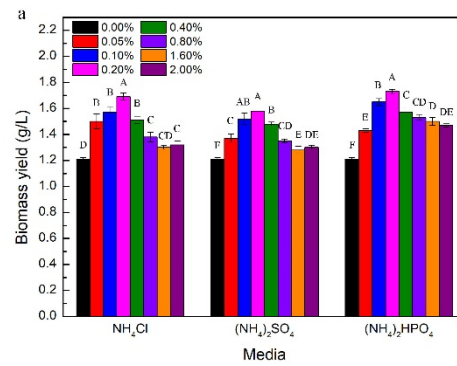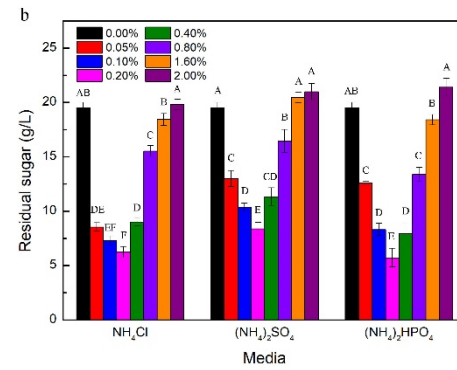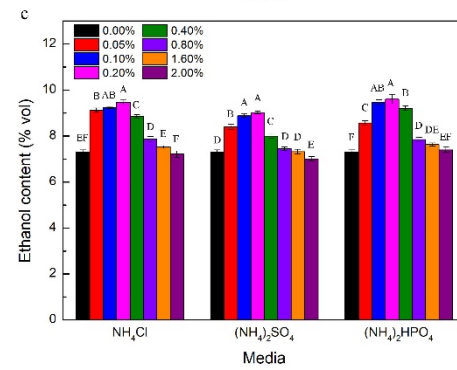

**Figure S2.** Effects of types and concentrations of nitrogen source on **a** biomass yield of D254, **b** residual sugar, and **c** ethanol content in SCG substrate. Values with different capital letters in the columns of the same color are significantly different ( $p < 0.05$ ).

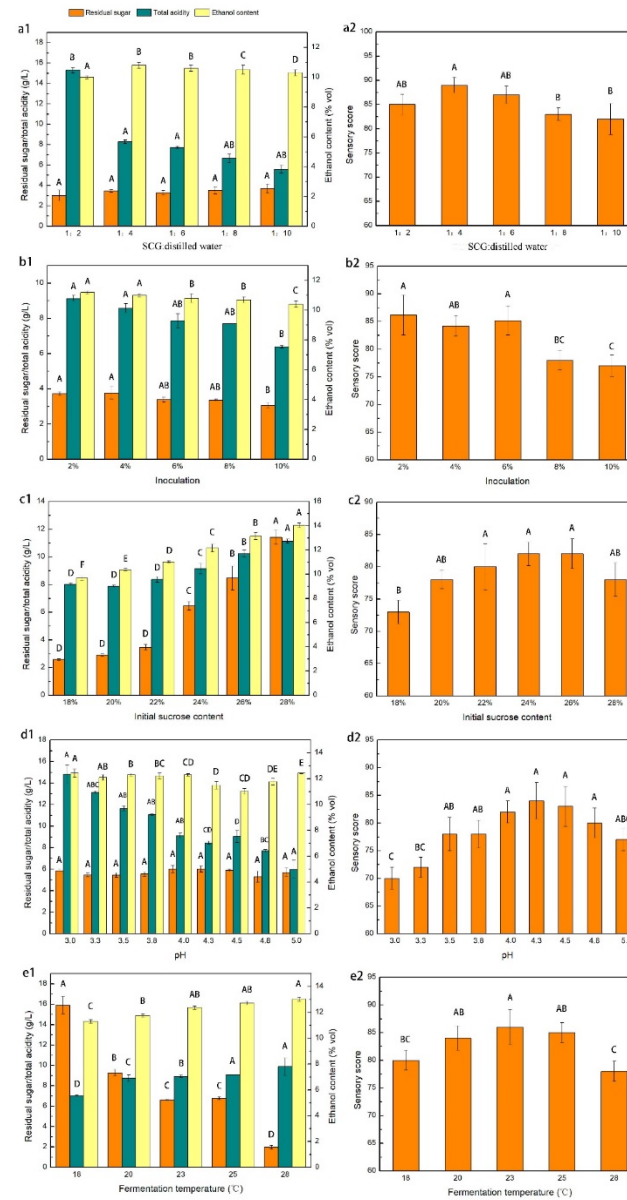

**Figure S3.** Effects of **a** the ratio of SCG **b** the inoculation amount of *S. cerevisiae* D254 **c** the initial content of sucrose **d** pH **e** fermentation temperature on the physicochemical and sensory properties of SFB. Values with different capital letters in the columns of the same color are significantly different ( $p < 0.05$ ). **a** For the optimization of SCG/water ratio, SCG and distilled water were mixed at the ratio of 1:2, 1:4, 1:6, 1:8 and 1:10 (g/mL). 20% sucrose was added and pH was adjusted to 4.0 by citric acid. 4% activated *S. cerevisiae* strain D254 was inoculated and the fermentation was conducted at 25°C for 9 days. **b** For the optimization of inoculations of *S. cerevisiae*, SCG and distilled water were mixed at the ratio of 1:4. 20% sucrose was added and pH was adjusted to 4.0 by citric acid. *S. cerevisiae* strain D254 was inoculated at a ratio of 2%, 4%, 6%, 8%, and 10%, and the fermentation was conducted at 25°C for 9 days. **c** For the optimization of sugar degree, SCG and distilled water were mixed at the ratio of 1:4. Sucrose was added at a concentration of 18%, 20%, 22%, 24%, 26%, and 28%. pH was adjusted to 4.0 by citric acid and 6% activated *S. cerevisiae* strain D254 was inoculated. The fermentation was conducted at 25°C for 9 days. **d** For the optimization of pH, SCG and distilled water were mixed at the ratio of 1:4. 24% sucrose was added and pH was adjusted to 3.0, 3.3, 3.5, 3.8, 4.0, 4.3, 4.5, 4.8, and 5.0 by citric acid. 6% activated *S. cerevisiae* strain D254 was inoculated and the fermentation was conducted at 25°C for 9 days. **e** For the optimization of fermentation temperature, SCG and distilled water were mixed at the ratio of 1:4. 24% sucrose was added and pH was adjusted to 4.3 by citric acid. 6% activated *S. cerevisiae* strain D254 was inoculated and the fermentation was conducted at 18°C, 20°C, 23°C, 25°C, and 28°C for 9 days.
